# Supplementary material for: Synthesis and photovoltaic properties of a low bandgap BODIPY–Pt conjugated polymer
Source: Royal Society of Chemistry journal article supplement (doi:10.1039/c3py01396k), 2013-10-22

## Supporting Information

### Synthesis and Photovoltaic Properties of a Low Bandgap BODIPY–Pt Conjugated Polymer

Wenhan He,<sup>a</sup> Yingbing Jiang<sup>b</sup> and Yang Qin<sup>\*a</sup>

<sup>a</sup> *Department of Chemistry & Chemical Biology, University of New Mexico, Albuquerque, NM 87131, United States*

<sup>b</sup> *TEM & FIB Laboratories, University of New Mexico, Albuquerque, NM 87131, United States*

\*Corresponding authors. E-mail: [yangqin@unm.edu](mailto:yangqin@unm.edu)

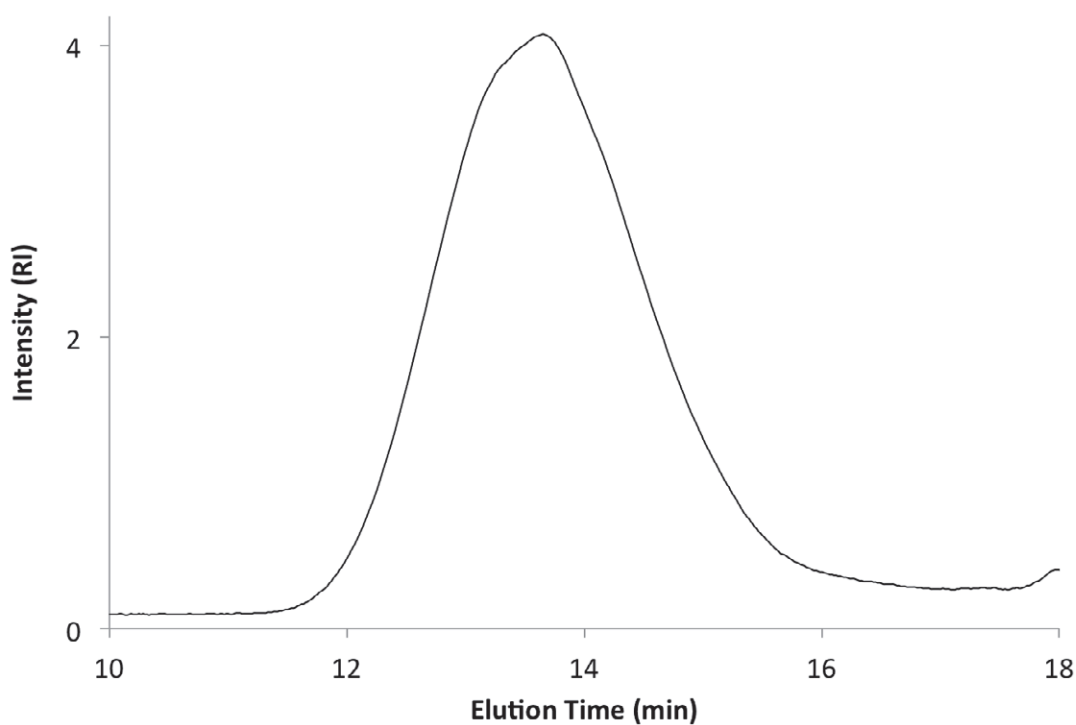

**Figure S1.** Size exclusion chromatography (SEC) profile of **P1** (CHCl<sub>3</sub>, 1 mL/min, RI).

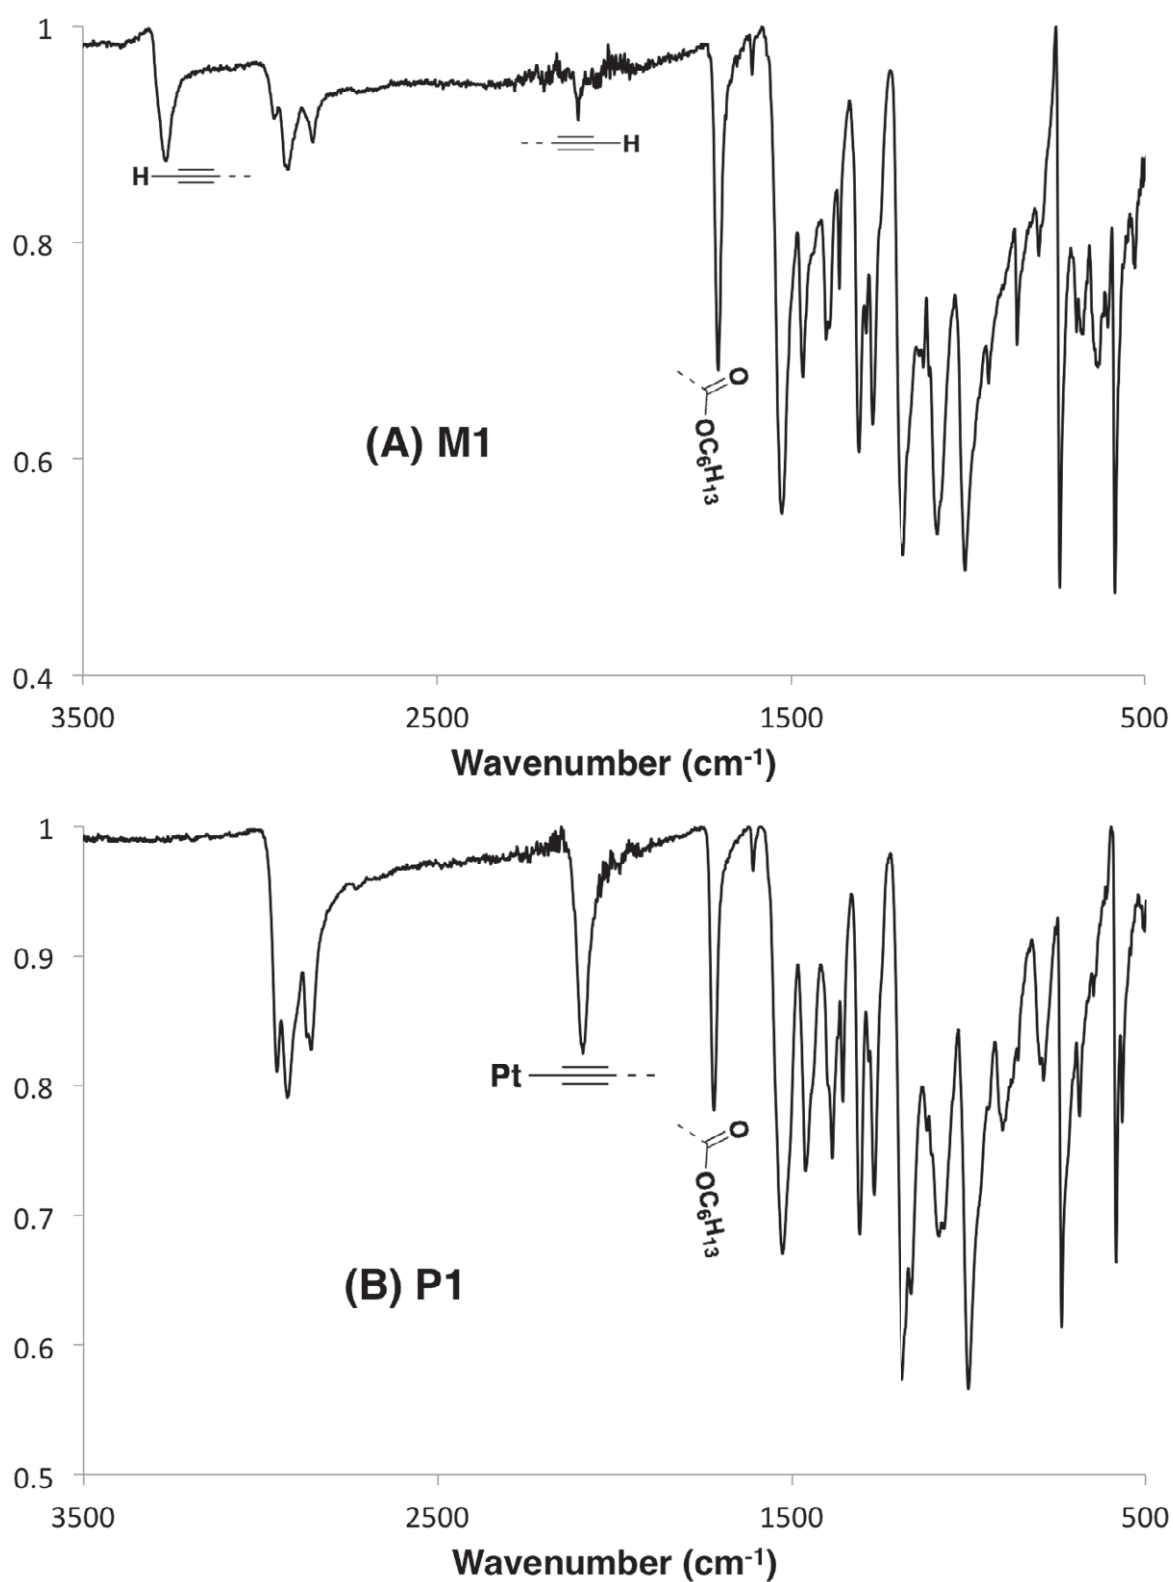

**Figure S2.** Attenuated total reflectance (ATR)-IR spectra of **M1** (A) and **P1** (B).

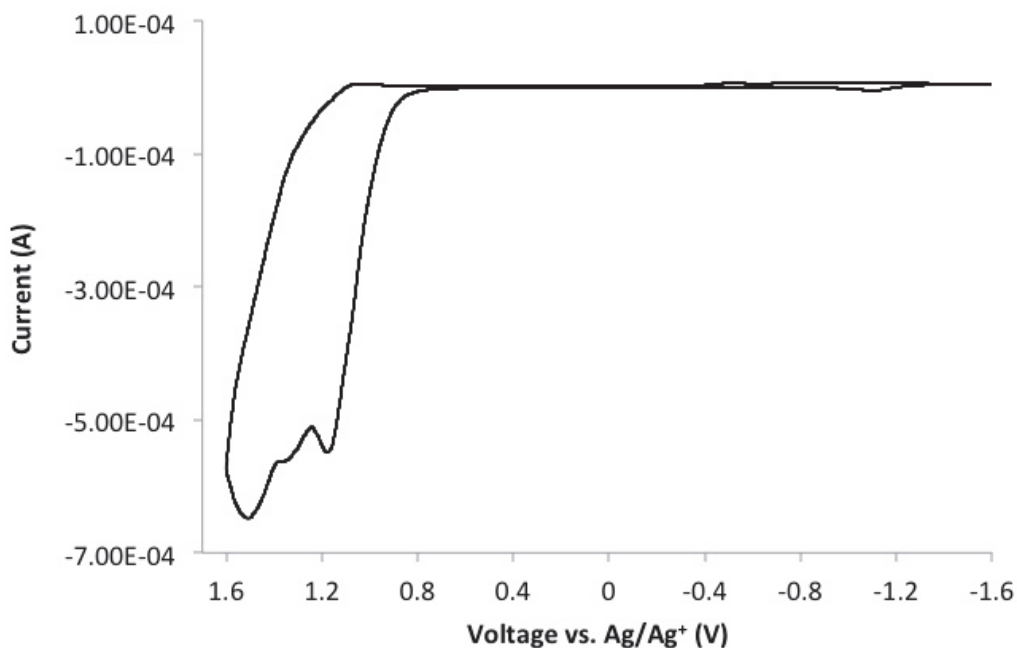

**Figure S3.** Cyclic voltammogram (CV) of **P1** thin film drop-cast onto the glassy carbon working electrode (0.1 M  $\text{Bu}_4\text{NPF}_6$  in acetonitrile as supporting electrolytes; 100 mV/s; externally referenced to ferrocene redox couple).

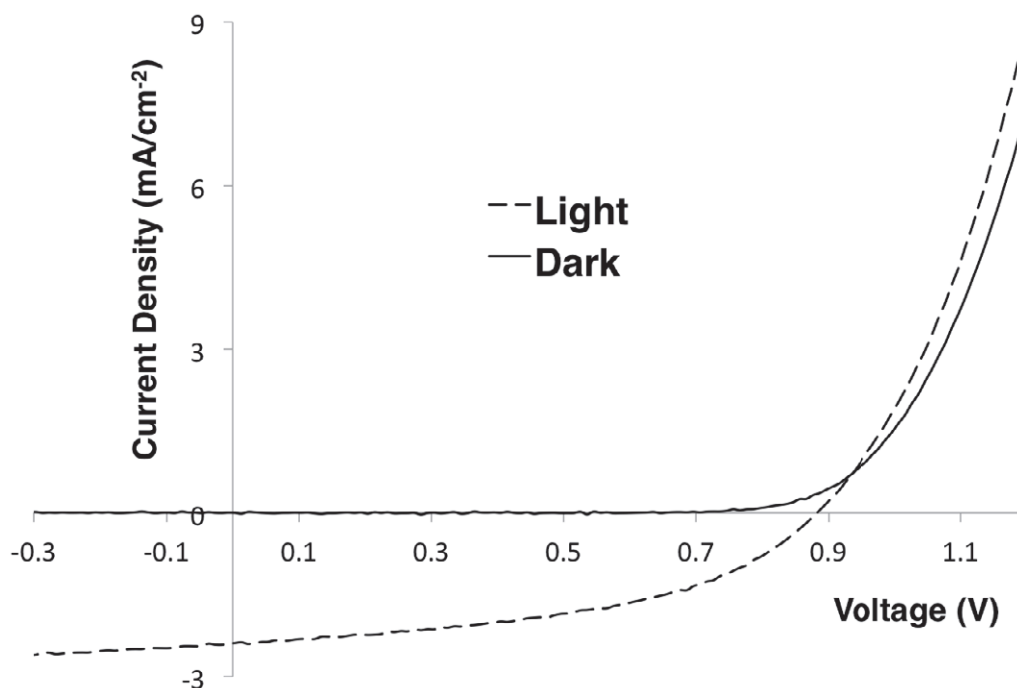

**Figure S4.** Current-Voltage (I-V) curves of solar cell devices using  $\text{MoO}_3$  as the anode interfacial layer and **P1**/PCBM (1/3 by weight) as the active layer in dark (solid line) and under simulated solar irradiation at  $100 \text{ mW/cm}^2$  (dashed line).

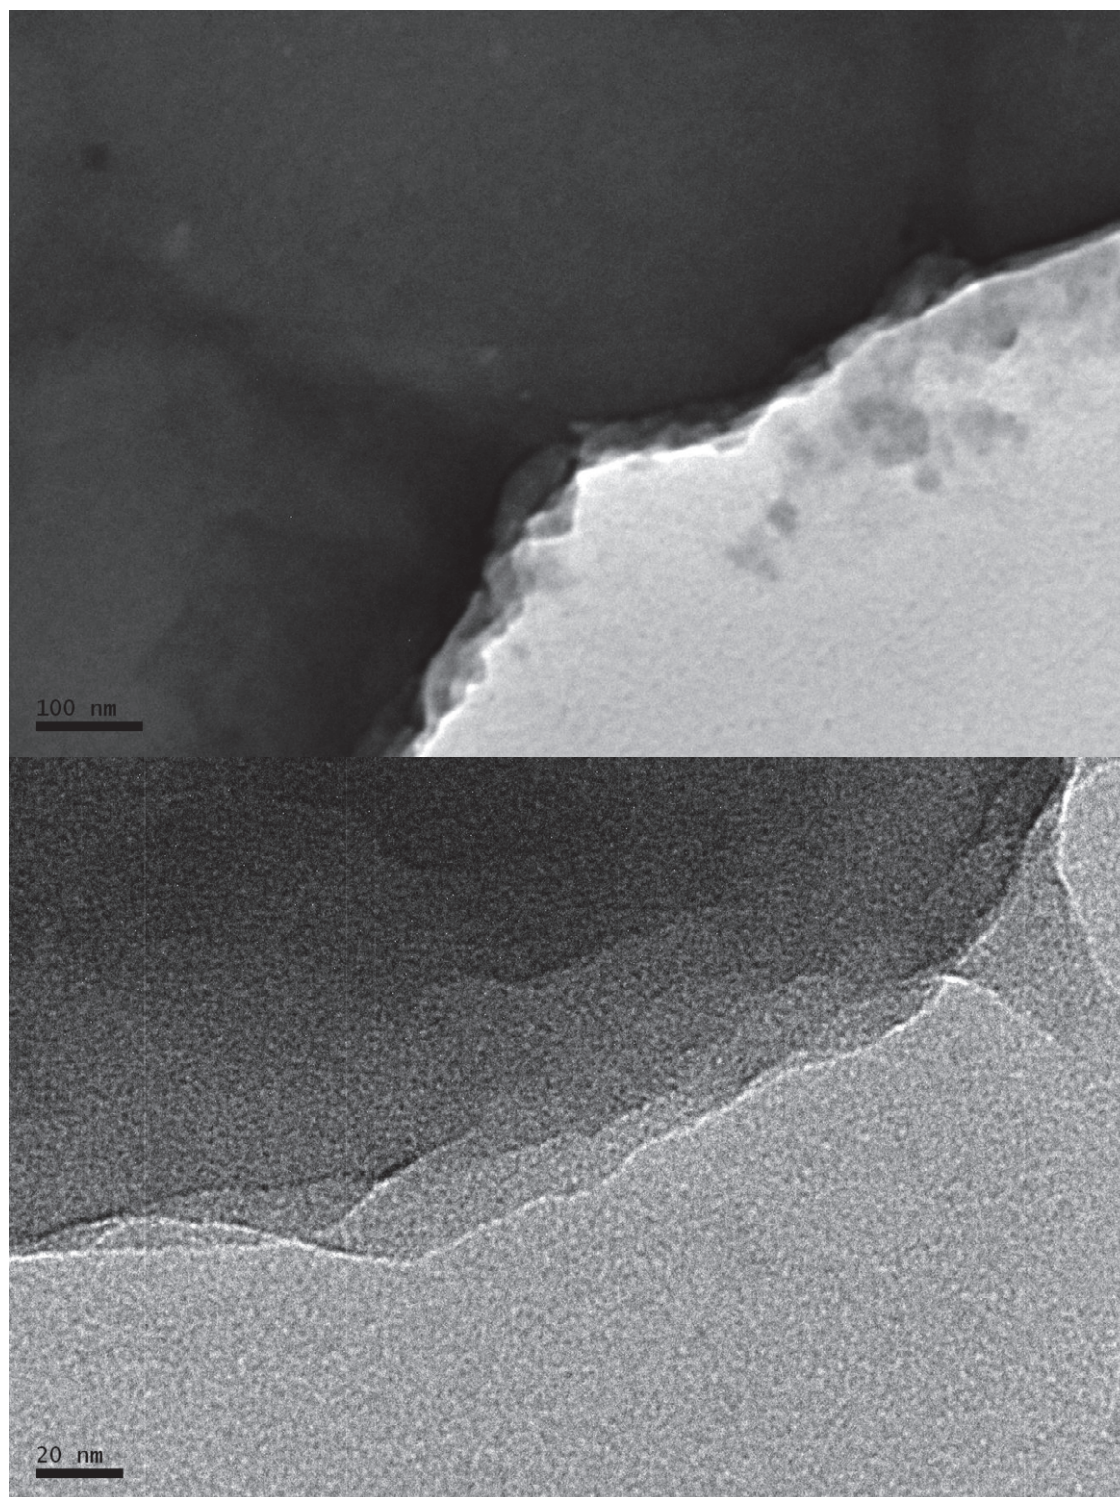

**Figure S5.** Transmission electron microscopy (TEM) images of active layers (**P1**/PCBM, 1/3 by weight) in OPV devices employing PEDOT:PSS as anode interfacial layer with 25k (top) and 100k (bottom) magnifications.

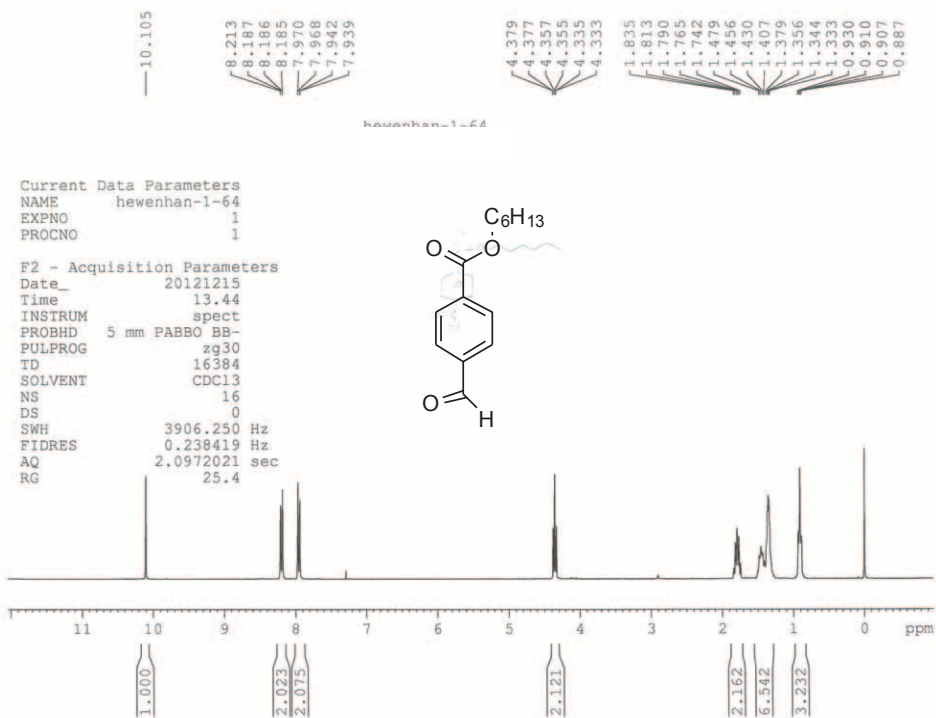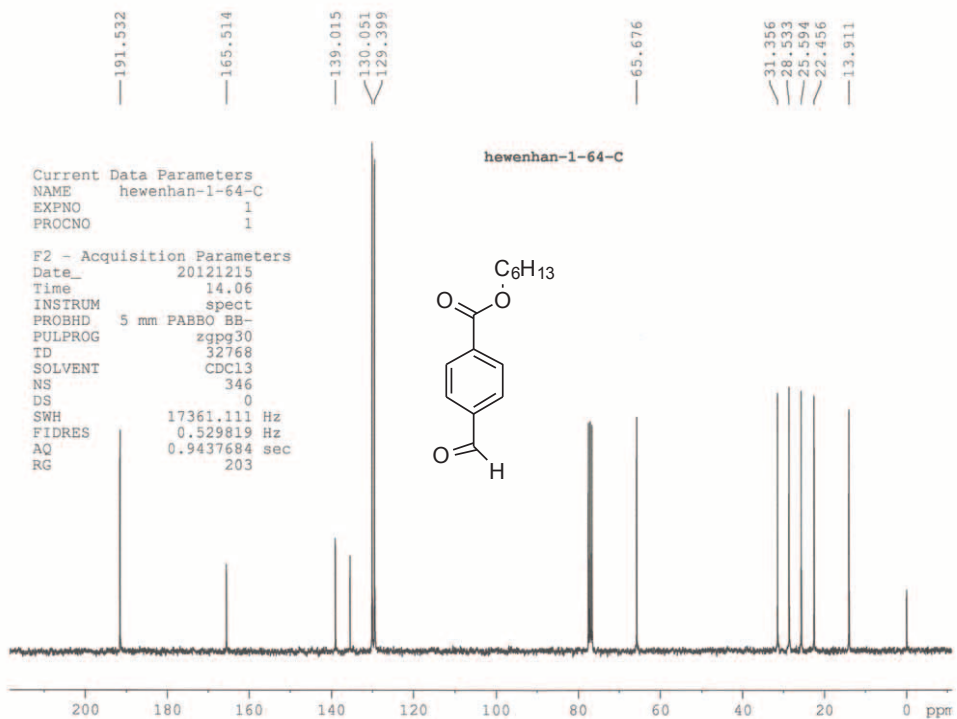



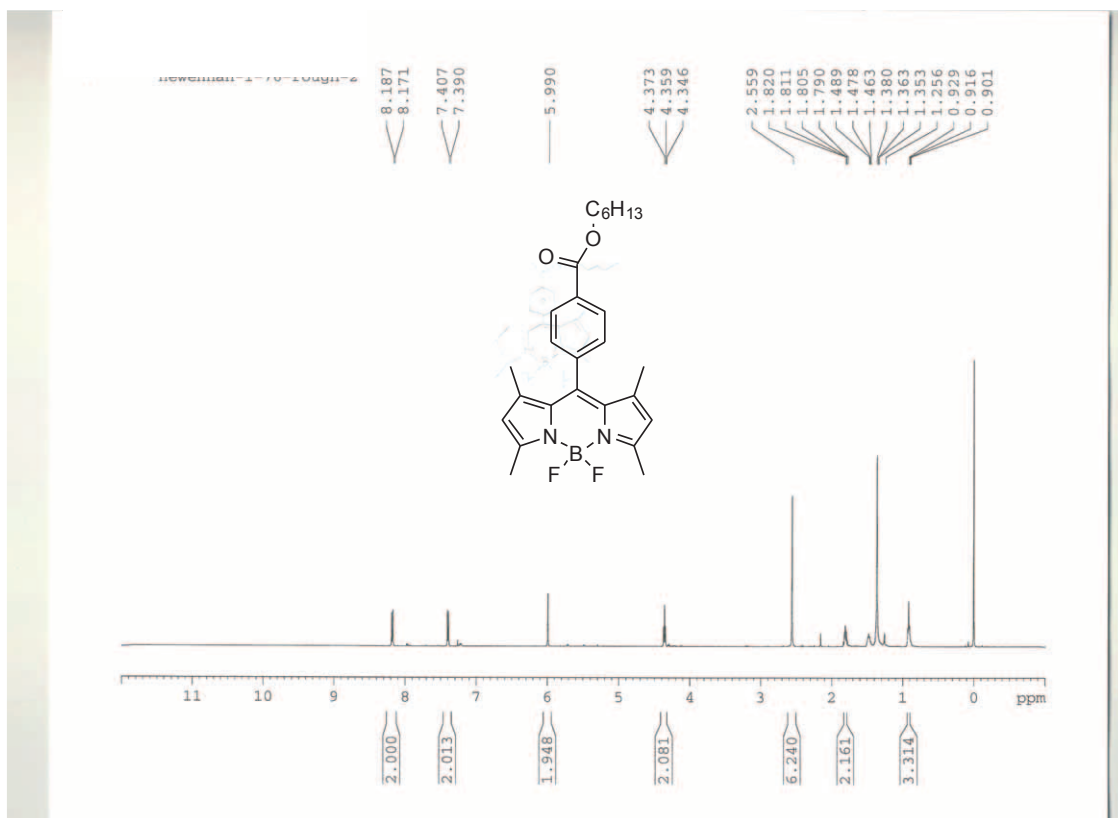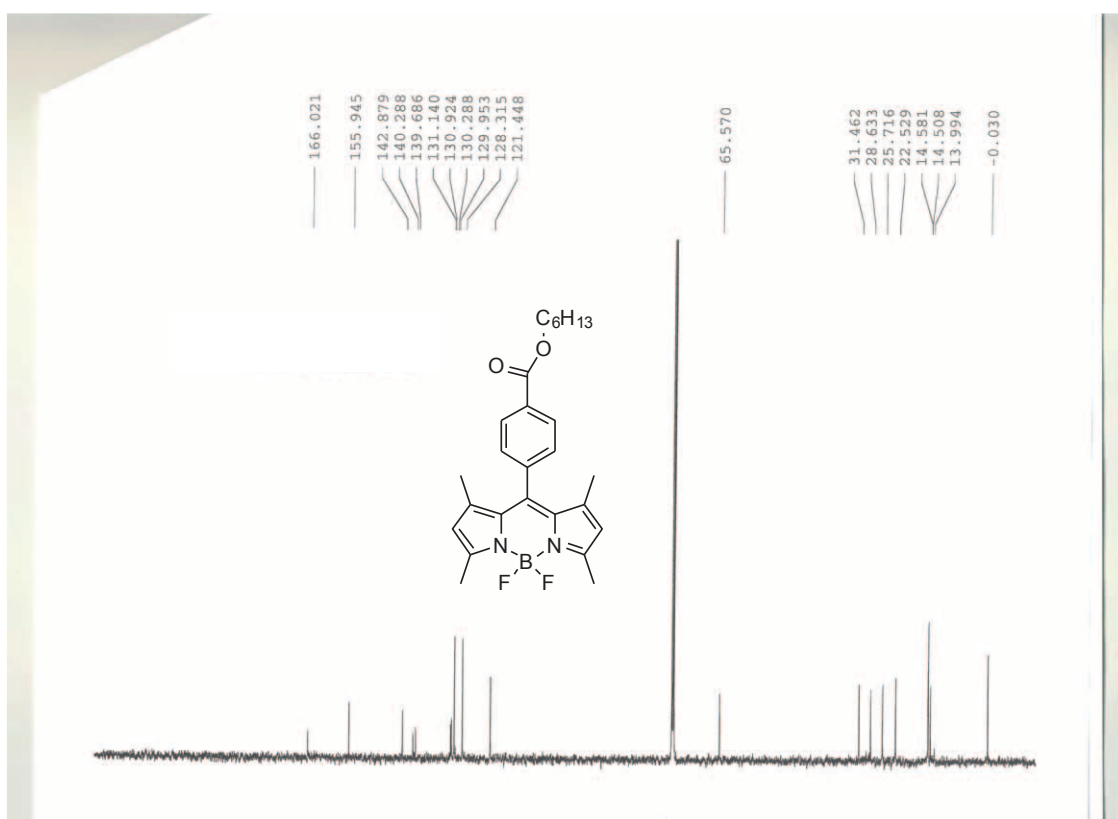

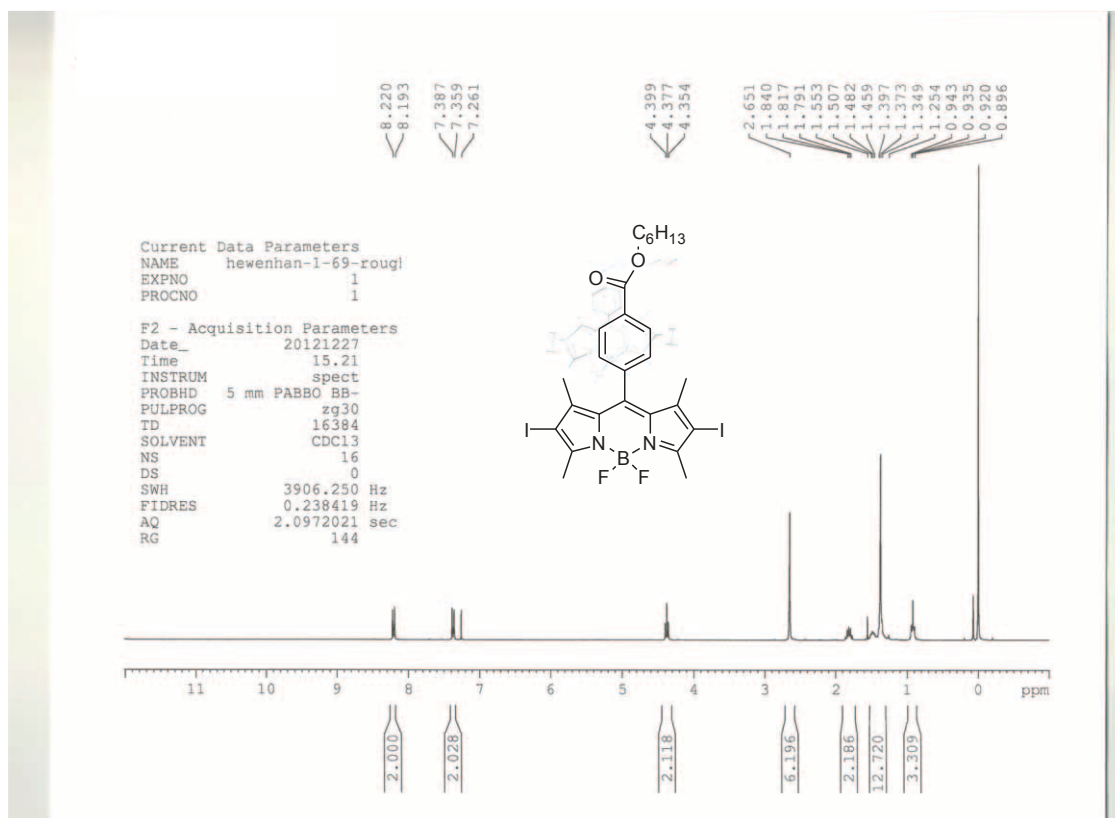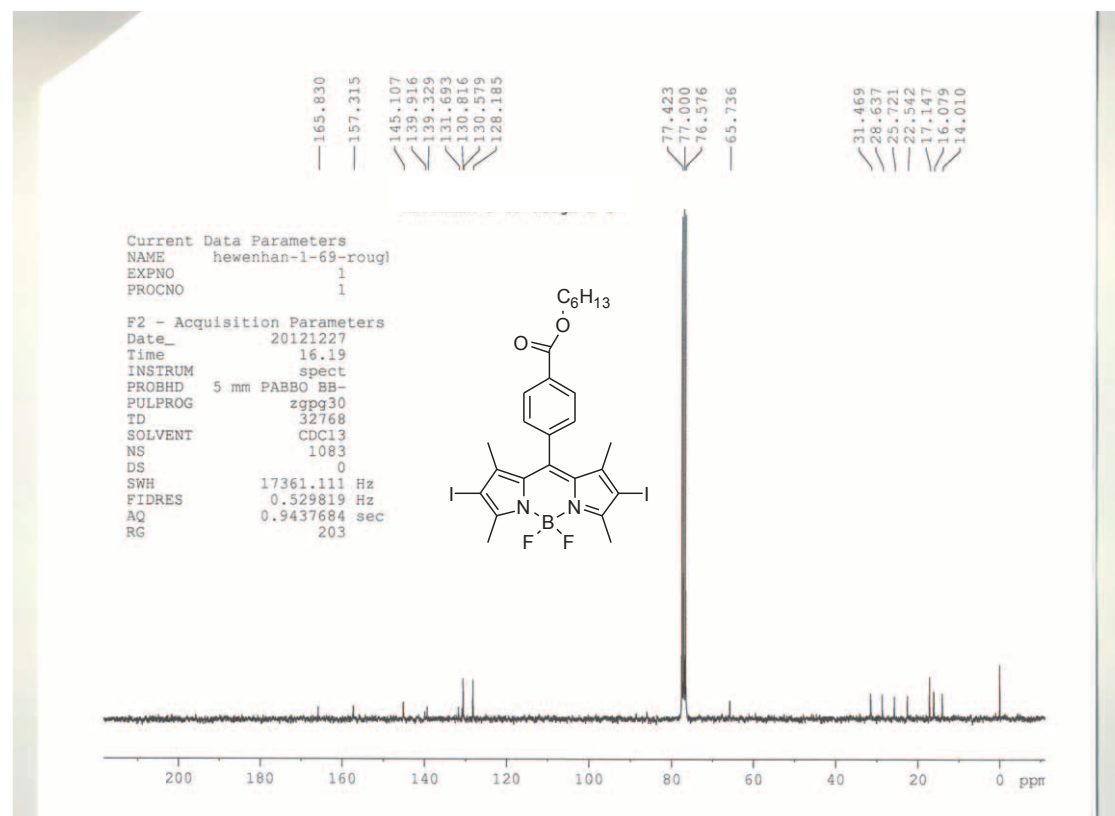

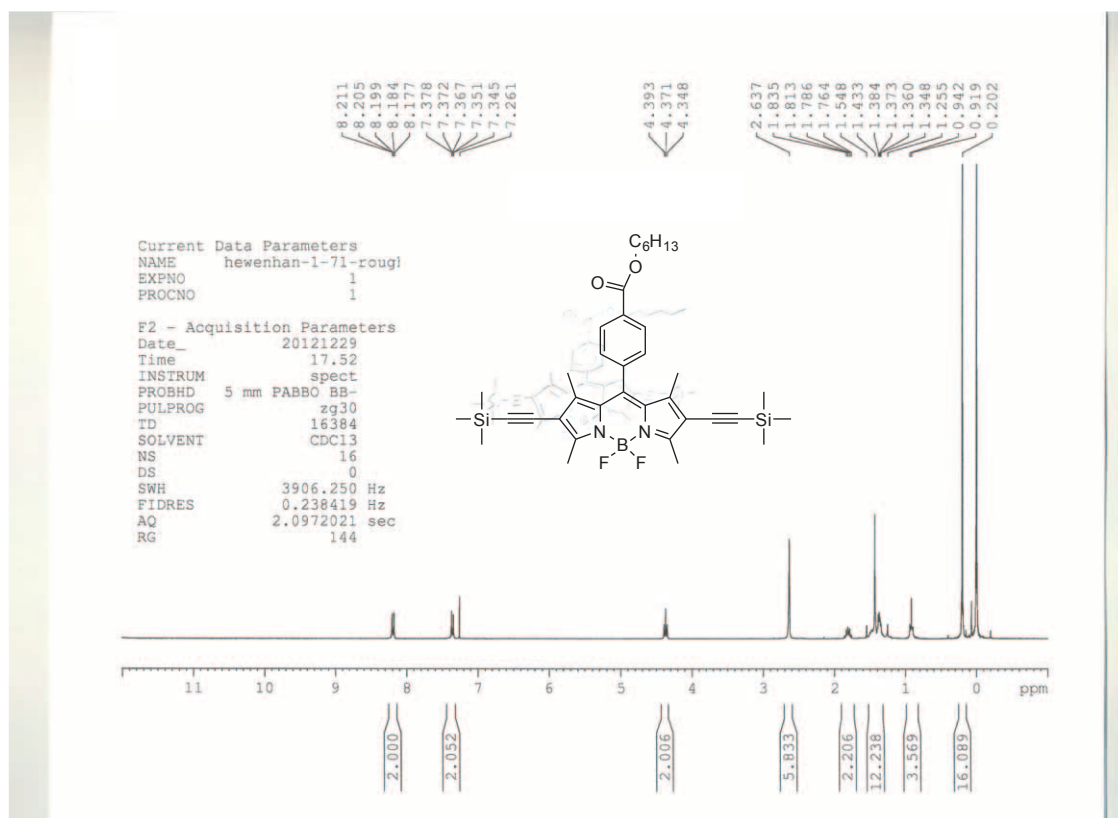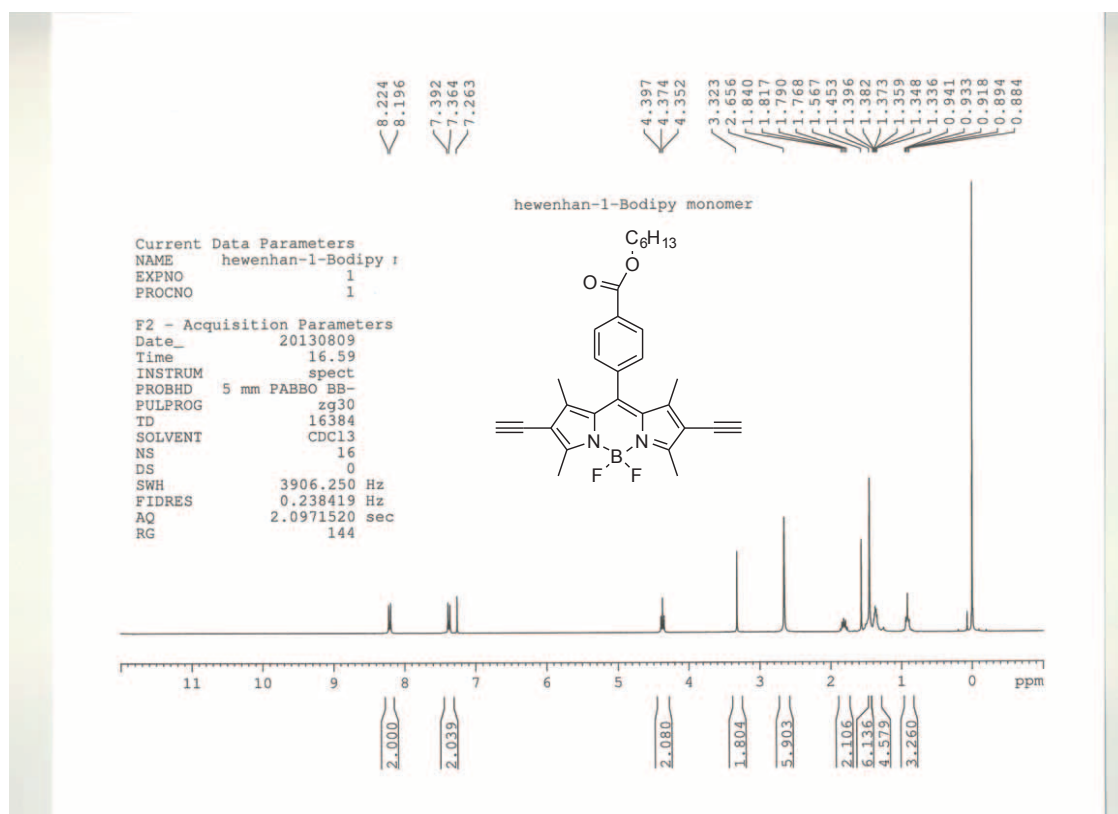



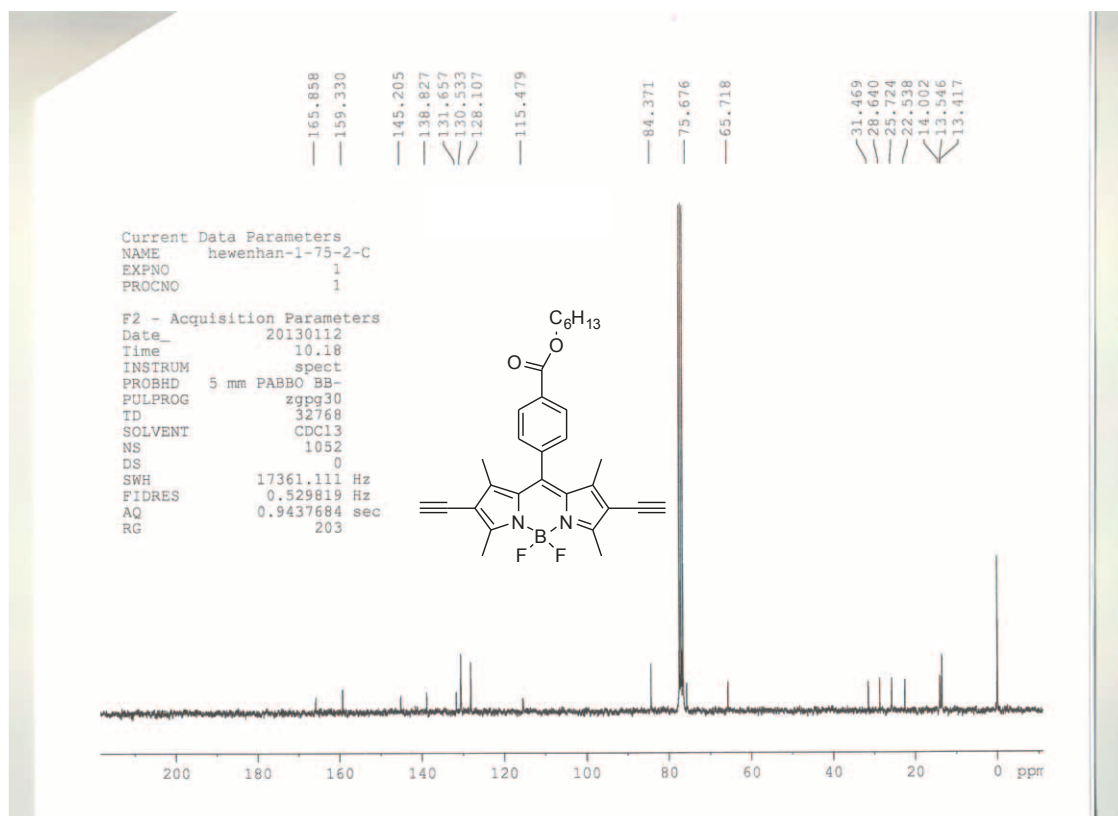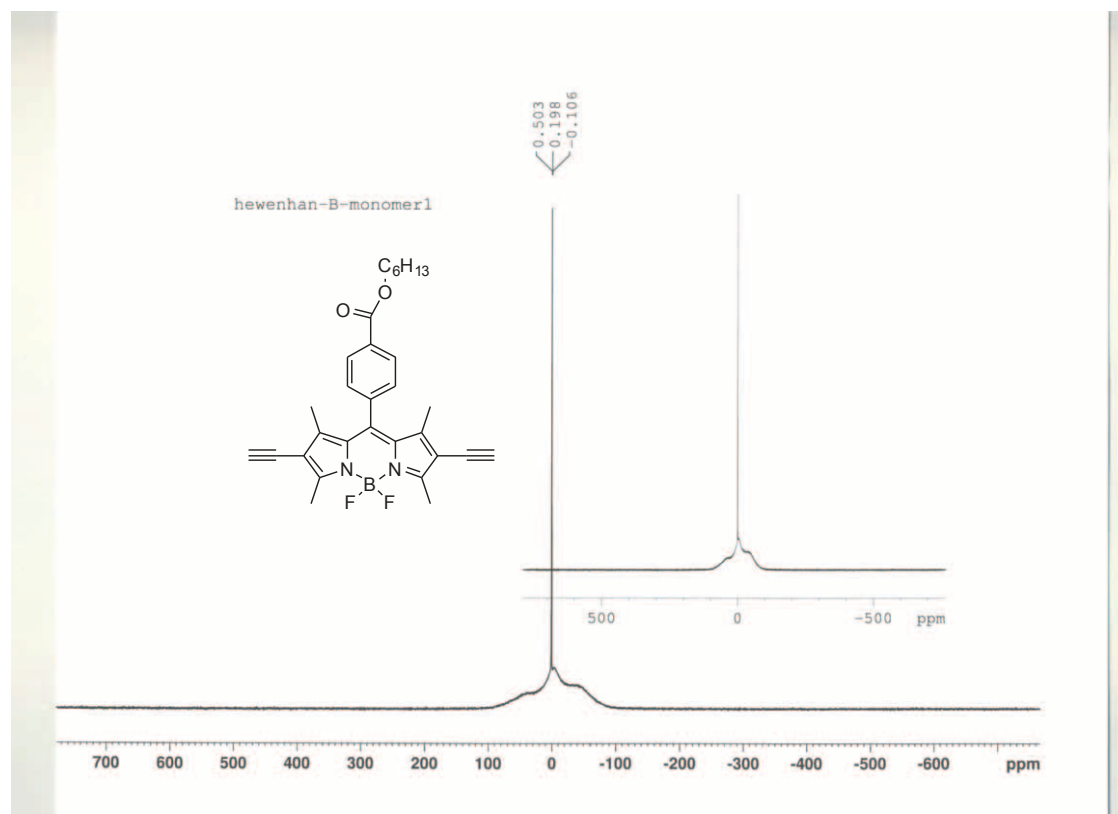

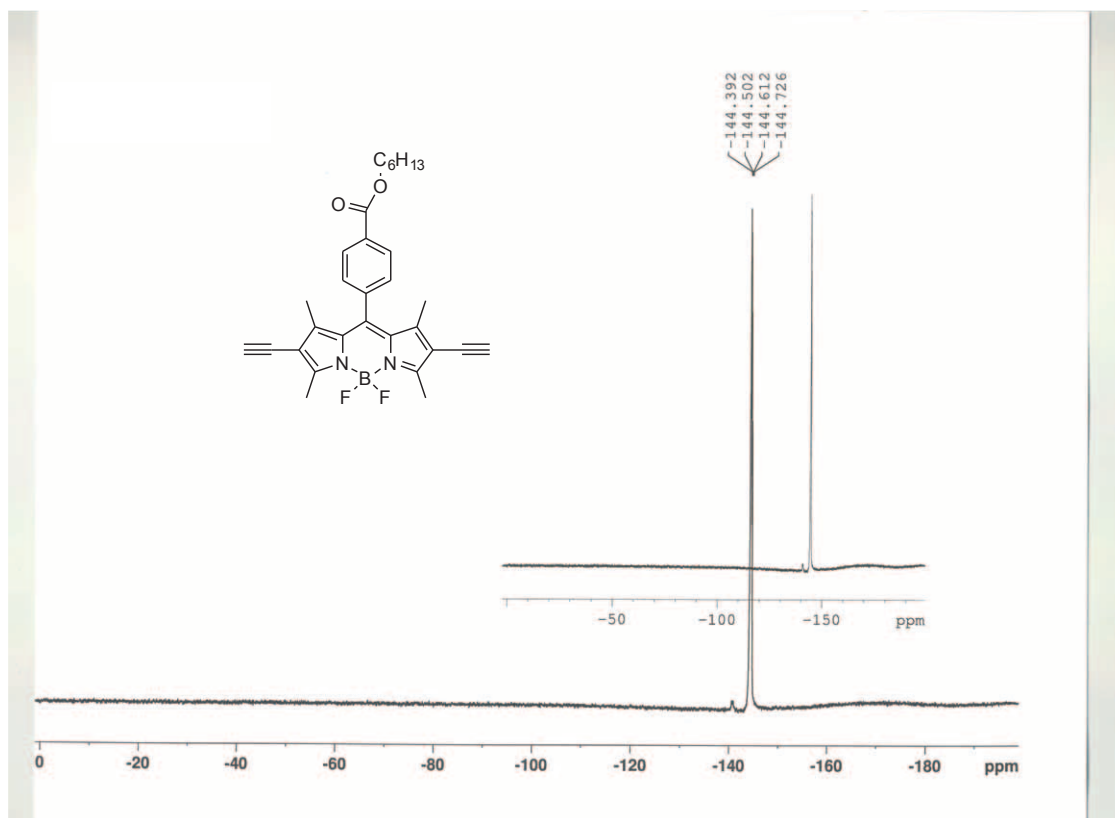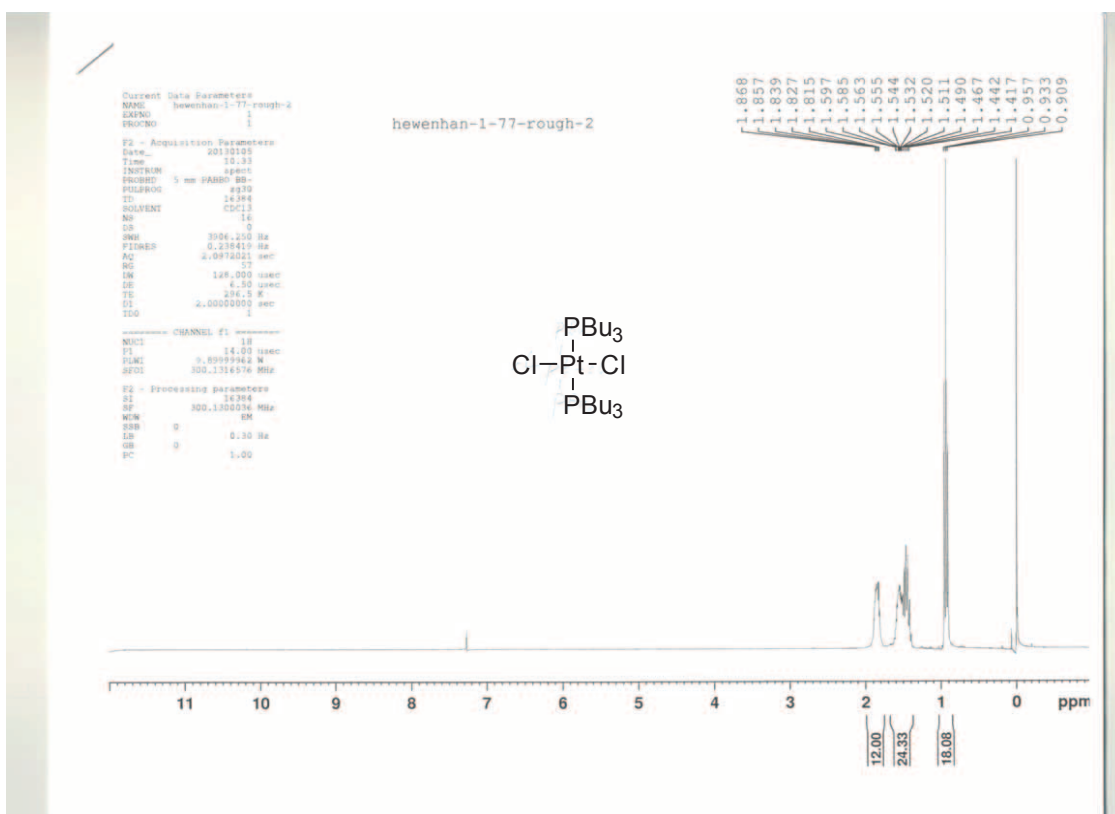

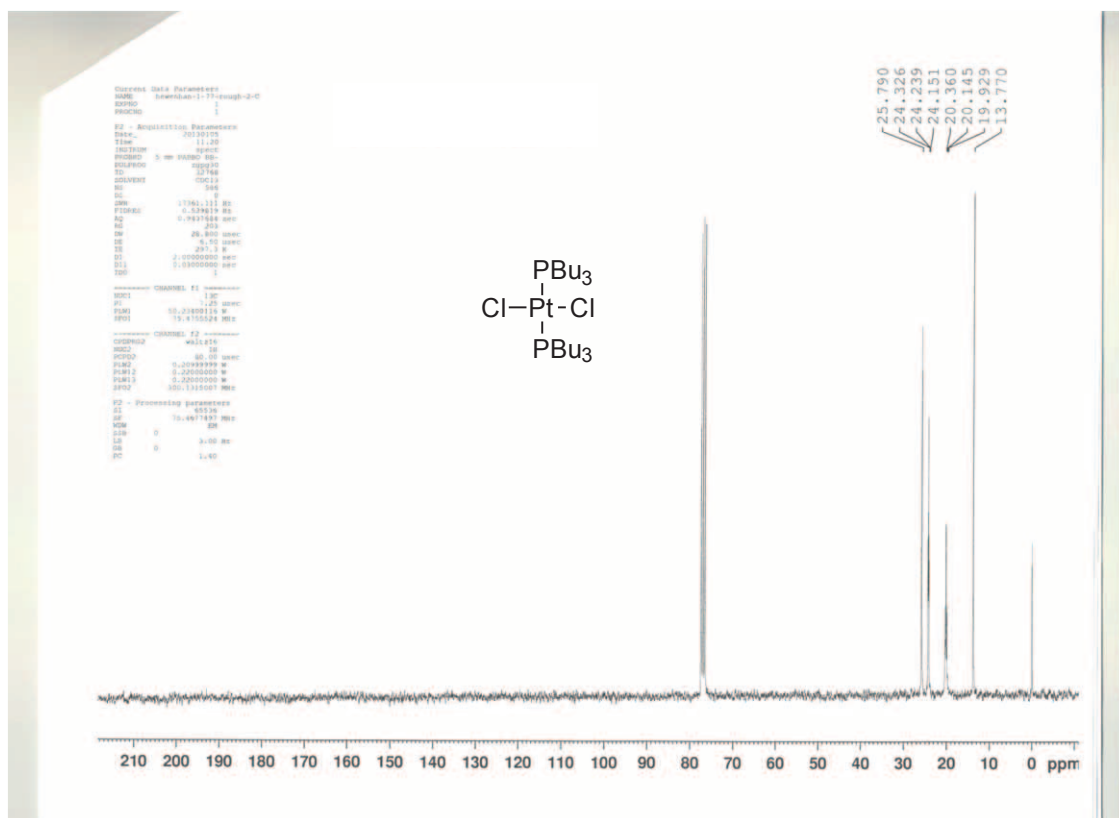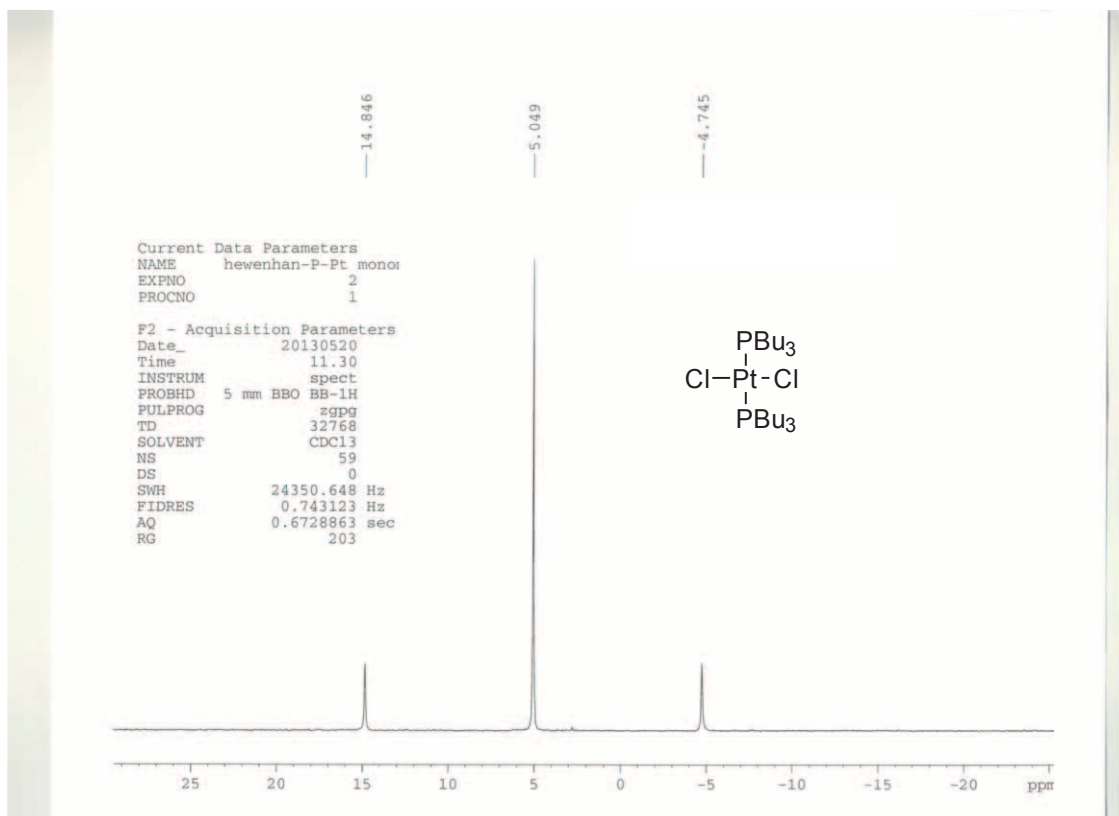

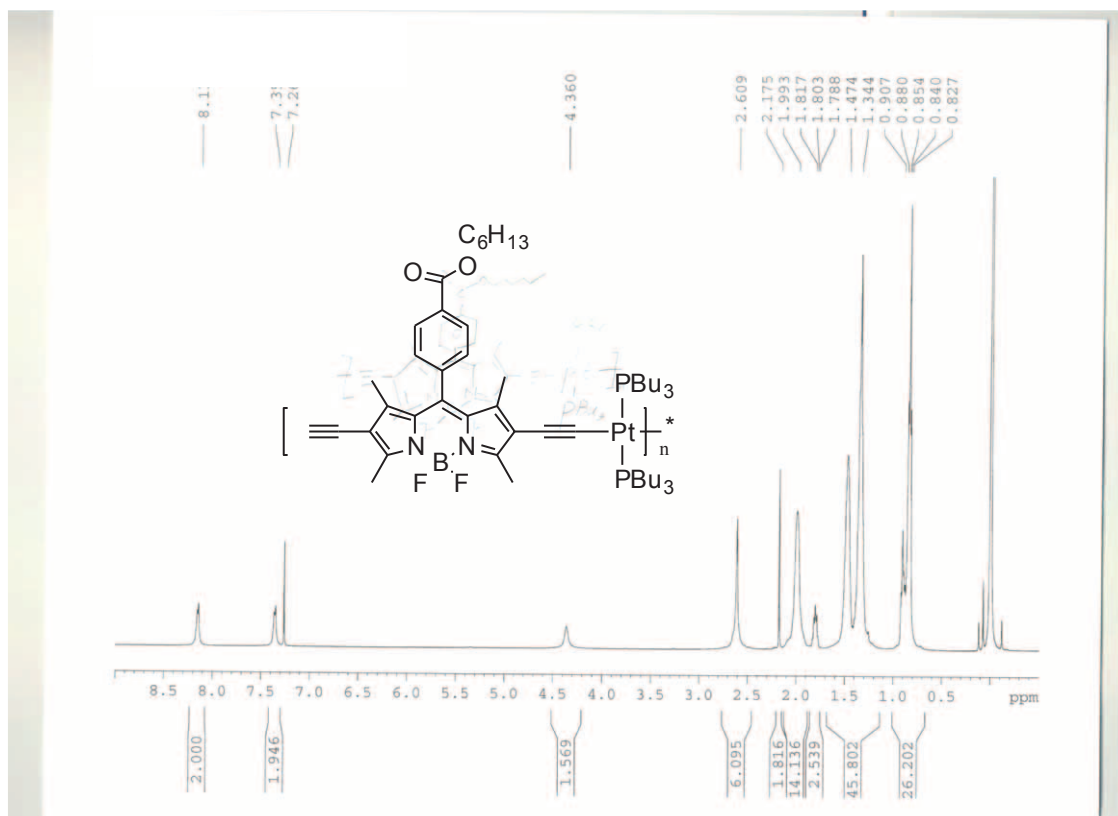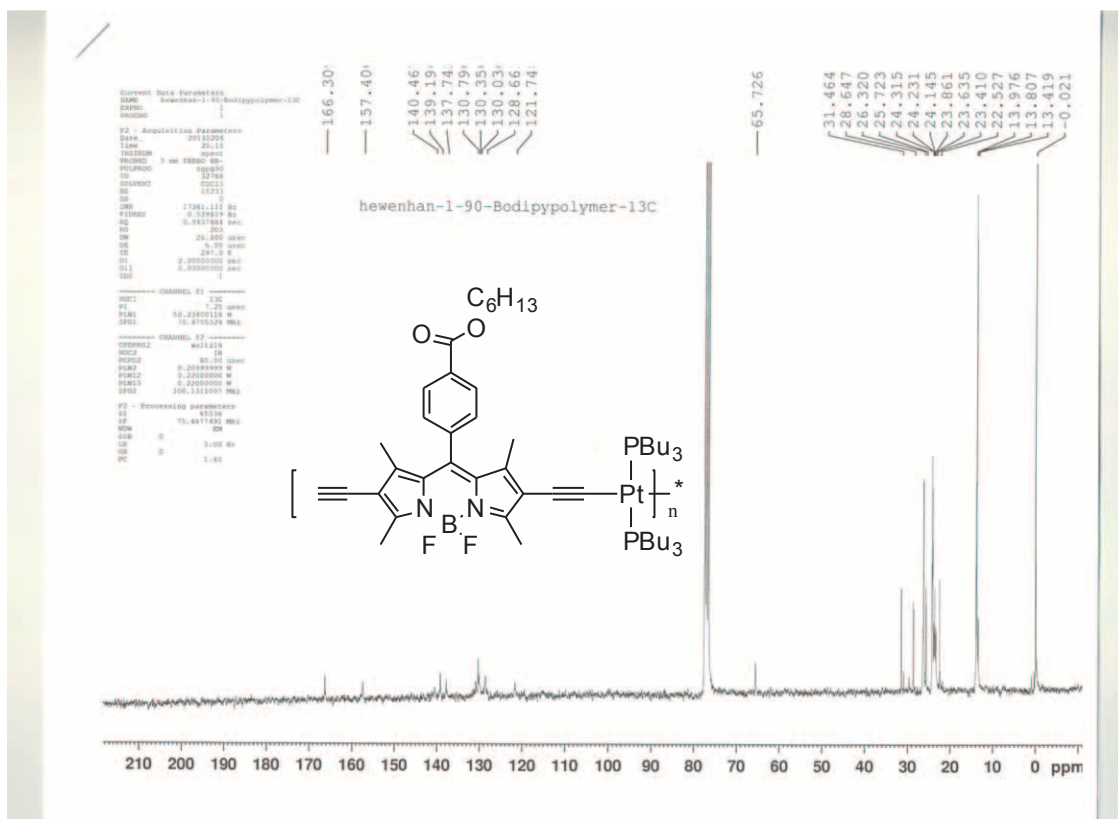

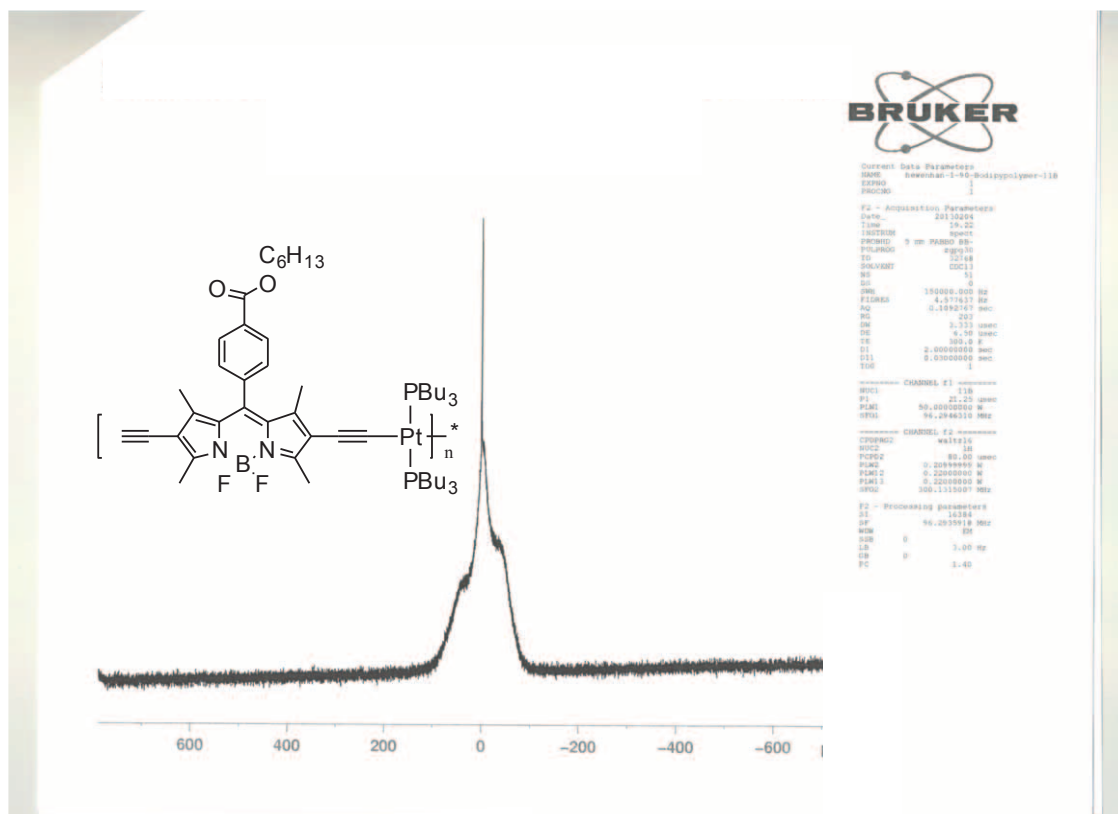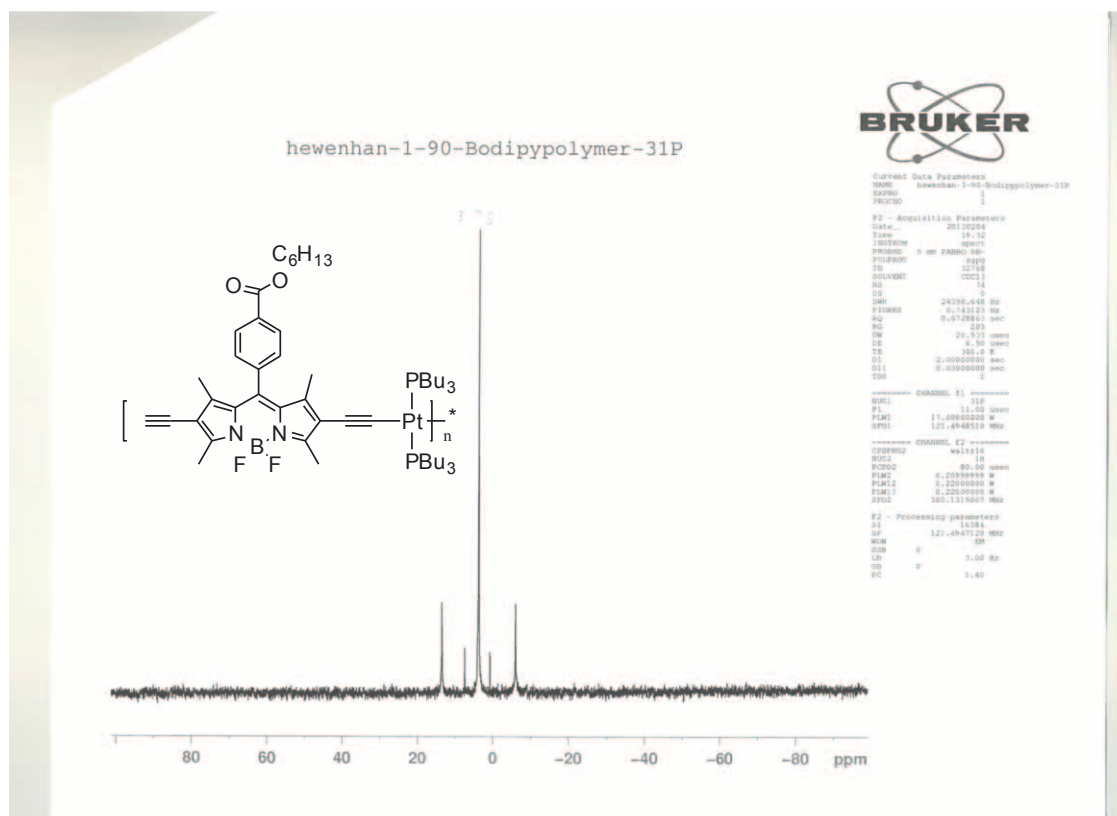



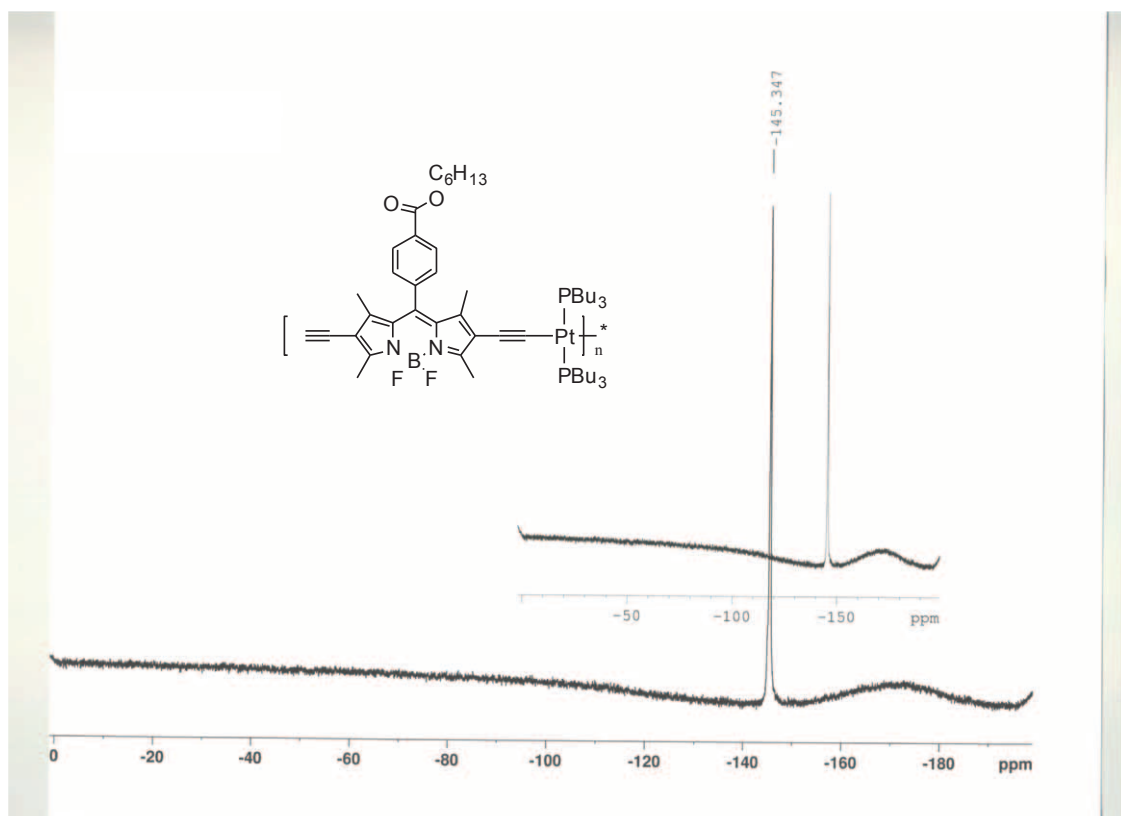

Supplement: c3py01396k.pdf [file c3py01396k.pdf]
